# Supplementary material
Source: publisher site journal article supplement (https://www.degruyterbrill.com/publication/journal_key/EM/downloadAsset/EM_LaTeX-template.zip)
Supplement: Supplementary file 4 [file EM_LaTeX-template.zip]

The logo features a white circle with a black border, containing the letters 'cc' in a stylized font. To the right of the circle is a gray rectangle. The entire logo is set against a black background.

cc

BY-NC-ND
