# Supplementary material
Source: publisher site journal article supplement (https://www.degruyterbrill.com/publication/journal_key/EM/downloadAsset/EM_LaTeX-template.zip)
Supplement: Supplementary file 8 [file EM_LaTeX-template.zip]

DEGRUYTER

SAUR
