# Supplementary material
Source: publisher site journal article supplement (https://www.degruyterbrill.com/publication/journal_key/EM/downloadAsset/EM_LaTeX-template.zip)

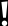

Supplement: Supplementary file 3 [file EM_LaTeX-template.zip]

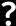

Supplement: Supplementary file 5 [file EM_LaTeX-template.zip]

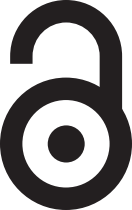

Supplement: Supplementary file 6 [file EM_LaTeX-template.zip]

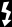

Supplement: Supplementary file 11 [file EM_LaTeX-template.zip]

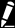

Supplement: Supplementary file 12 [file EM_LaTeX-template.zip]

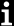

Supplement: Supplementary file 14 [file EM_LaTeX-template.zip]
